# Supplementary material for: The link between SARS-CoV-2 related microglial reactivity and astrocyte pathology in the inferior olivary nucleus
Source: Front Neurosci. 2023 Jun 28;17:1198219. doi: 10.3389/fnins.2023.1198219 (PMC10359900; doi:10.3389/fnins.2023.1198219)
Supplement: SUPPLEMENTARY TABLE 1 — Cohort demographic and clinical data. [file Table_1.XLSX]

## Sheet: microglia_per_area
Microglia per area
Standardized weighted residuals 2:
Min 1Q Median 3Q Max
-2.6128 -0.5605 0.0564 0.8428 1.4819
Coefficients (mean model with logit link):
Estimate Std. Error z value Pr(>|z|)
(Intercept) -9.3681 0.2416 -38.777 < 2e-16 ***
ConditionControl 0.4272 0.2577 1.658 0.09731 .
ConditionCoV 0.8705 0.2082 4.182 2.89e-05 ***
RegionLateral 0.5464 0.1945 2.809 0.00496 **
RegionVentral 0.2117 0.2012 1.052 0.29286
Phi coefficients (precision model with identity link):
Estimate Std. Error z value Pr(>|z|)
(phi) 4626.7 762.3 6.07 1.28e-09 ***
---
Signif. codes: 0 '***' 0.001 '**' 0.01 '*' 0.05 '.' 0.1 ' ' 1
Type of estimator: ML (maximum likelihood)
Log-likelihood: 757 on 6 Df
Pseudo R-squared: 0.2949
Number of iterations: 5000 (BFGS) + 12 (Fisher scoring)

## Sheet: proportion_activated_microglia
Proportion of activated microglia
Standardized weighted residuals 2:
Min 1Q Median 3Q Max
-2.9090 -0.5629 0.0848 0.7324 1.8740
Coefficients (mean model with logit link):
Estimate Std. Error z value Pr(>|z|)
(Intercept) -3.04473 0.14493 -21.008 < 2e-16 ***
ConditionMN 0.50914 0.14741 3.454 0.000553 ***
ConditionNo-MN 0.27240 0.16025 1.700 0.089156 .
RegionLateral 0.02952 0.14378 0.205 0.837313
RegionVentral -0.18933 0.14982 -1.264 0.206340
Phi coefficients (precision model with identity link):
Estimate Std. Error z value Pr(>|z|)
(phi) 54.493 8.739 6.236 4.49e-10 ***
---
Signif. codes: 0 '***' 0.001 '**' 0.01 '*' 0.05 '.' 0.1 ' ' 1
Type of estimator: ML (maximum likelihood)
Log-likelihood: 175.8 on 6 Df
Pseudo R-squared: 0.1528
Number of iterations: 27 (BFGS) + 3 (Fisher scoring)

## Sheet: gfap_per_area
GFAP per area
Standardized weighted residuals 2:
Min 1Q Median 3Q Max
-2.2466 -0.5364 -0.1154 0.3490 3.2298
Coefficients (mean model with logit link):
Estimate Std. Error z value Pr(>|z|)
(Intercept) -5.164884 0.011700 -441.457 < 2e-16 ***
ConditionControl -0.082774 0.014773 -5.603 2.1e-08 ***
ConditionCoV 0.012958 0.011571 1.120 0.263
RegionLateral -0.015785 0.012199 -1.294 0.196
RegionVentral -0.001845 0.011975 -0.154 0.878
Phi coefficients (precision model with identity link):
Estimate Std. Error z value Pr(>|z|)
(phi) 74421 10580 7.034 2e-12 ***
---
Signif. codes: 0 '***' 0.001 '**' 0.01 '*' 0.05 '.' 0.1 ' ' 1
Type of estimator: ML (maximum likelihood)
Log-likelihood: 671.9 on 6 Df
Pseudo R-squared: 0.3746
Number of iterations: 72 (BFGS) + 67 (Fisher scoring)

## Sheet: percent_mt3
Percent MT3
Standardized weighted residuals 2:
Min 1Q Median 3Q Max
-3.0699 -0.4137 0.1195 0.7212 2.0408
Coefficients (mean model with logit link):
Estimate Std. Error z value Pr(>|z|)
(Intercept) -1.82325 0.18901 -9.646 < 2e-16 ***
ConditionCoV-MN -0.61909 0.19635 -3.153 0.00162 **
ConditionCoV-no-MN -0.09483 0.18656 -0.508 0.61126
RegionLateral 0.61808 0.20422 3.027 0.00247 **
RegionVentral 0.61808 0.20422 3.027 0.00247 **
Phi coefficients (precision model with identity link):
Estimate Std. Error z value Pr(>|z|)
(phi) 11.217 1.763 6.361 2.01e-10 ***
---
Signif. codes: 0 '***' 0.001 '**' 0.01 '*' 0.05 '.' 0.1 ' ' 1
Type of estimator: ML (maximum likelihood)
Log-likelihood: 78.85 on 6 Df
Pseudo R-squared: 0.2047
Number of iterations: 14 (BFGS) + 3 (Fisher scoring)
